# Supplementary material for: Biomarkers of mortality in adults and adolescents with advanced HIV in sub-Saharan Africa
Source: PubMed Central journal article supplement (PMC11214617; doi:10.1038/s41467-024-49317-7), 2024-06-28
Supplement: 41467_2024_49317_MOESM1_ESM.pdf [file 41467_2024_49317_MOESM1_ESM.pdf]

## SUPPLEMENTARY MATERIAL

**Supplementary Table 1: Time to death by cause**

| Cause                      | N   | Days until death - median (IQR) |
|----------------------------|-----|---------------------------------|
| All cause                  | 169 | 41 (20, 68)                     |
| TB                         | 61  | 32 (19, 64)                     |
| Cryptococcosis             | 14  | 45 (23, 68)                     |
| Severe bacterial infection | 21  | 20 (14, 50)                     |
| Other                      | 53  | 45 (23, 74)                     |
| Unknown                    | 70  | 46 (24, 80)                     |

**Supplementary Table 2: Best subsets regression models**

| <b>Cause</b>               | <b>Model from stepwise selection</b>    | <b>Best model</b>                       | <b>Difference in AIC</b> | <b>Ranking by AIC (1=lowest AIC)</b> | <b>Total possible models</b> |
|----------------------------|-----------------------------------------|-----------------------------------------|--------------------------|--------------------------------------|------------------------------|
| All cause                  | CRP, IFNG, IL2, IL6, IL23, IP10, Rantes | IP10, IL6, IL18, IL2, Rantes, IL23, CRP | 1.7                      | 4                                    | 5,379,616                    |
| TB                         | CRP, ST2                                | CRP, ST2                                | -                        | 1                                    | 595                          |
| Cryptococcosis             | IL4, IL8                                | IL4, IL8                                | -                        | 1                                    | 595                          |
| Severe bacterial infection | CRP, CD163                              | CRP, CD163                              | -                        | 1                                    | 595                          |
| Other                      | IL9, IFNG, CD14                         | IL9, IL18, CD14                         | 3.4                      | 3                                    | 6,545                        |
| Unknown                    | TNFA, IL18, Rantes, CD14, IFABP         | IL7, IL8, Rantes, CD14, IFABP           | 5.3                      | 31                                   | 277,984                      |

## Supplementary Figure 1: CONSORT diagram

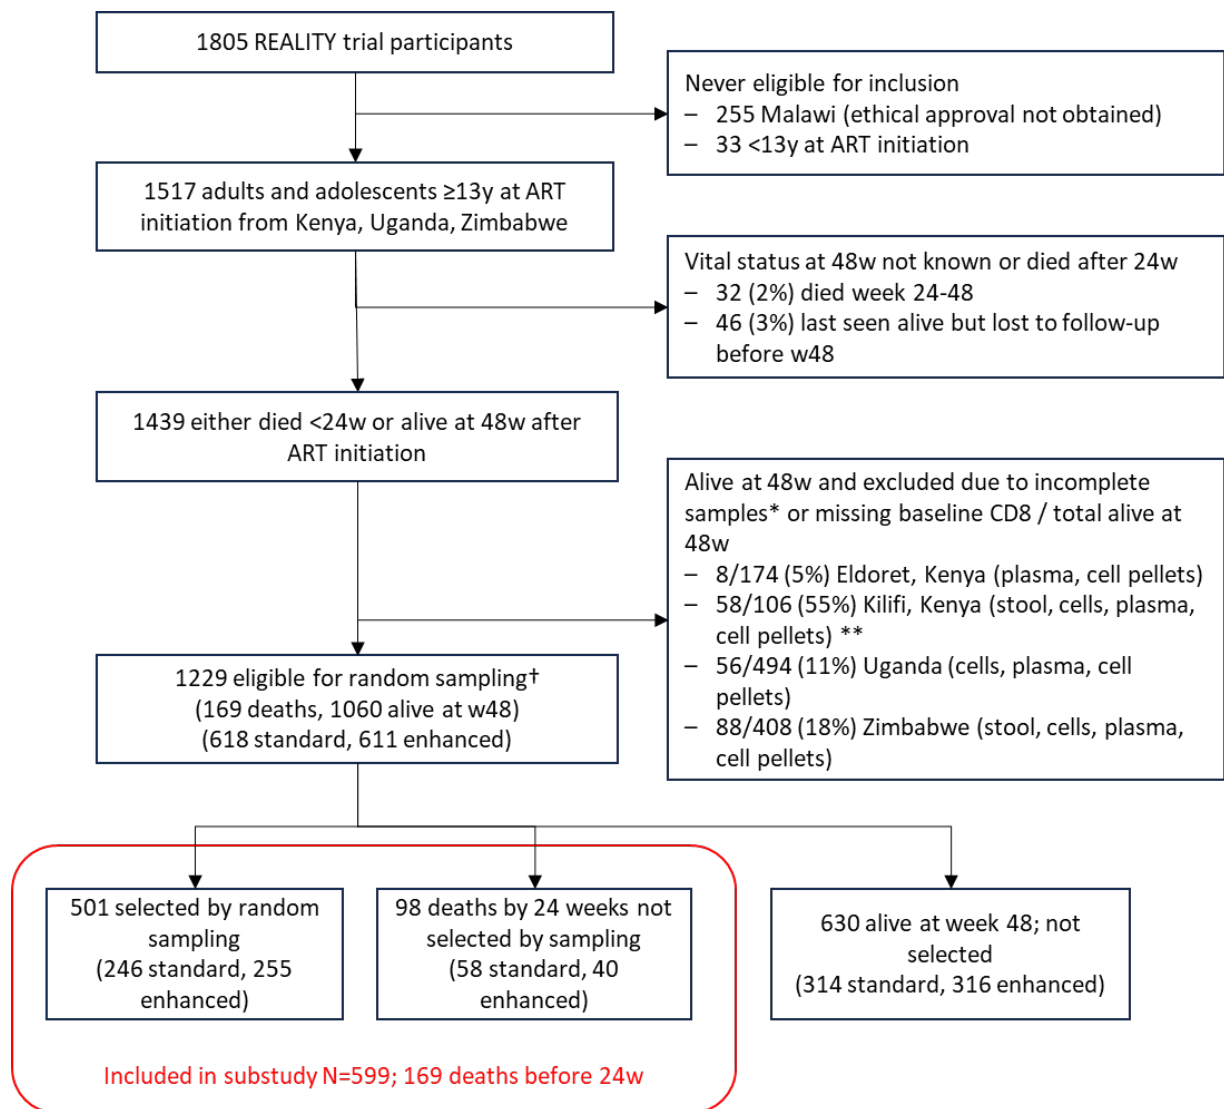

\* incomplete samples defined as missing any of baseline, week 4 or week 12 for the sets of samples stated in those known to be alive at w48.

\*\* baseline CD8 missing in 30 due to reagent unavailability; excluded on the basis of missing samples only 28/106 (26%)

† Random sampling (stratified by site and CD4 count (0-24, 25-49, 50-99 cells/mm<sup>3</sup>; approximate terciles)) comprised 45% of participants from sites storing stool, buffy coat cells, plasma and baseline cell pellet (90% from Kilifi, Kenya because of missing baseline CD8<sup>+</sup> due to reagent unavailability), 45% from sites storing buffy coat cells and plasma/cell pellets (but not stool) (Uganda), and 10% from one single site storing plasma/cell pellets only (Eldoret, Kenya).

Supplementary Figure 2: Spearman correlation of biomarkers

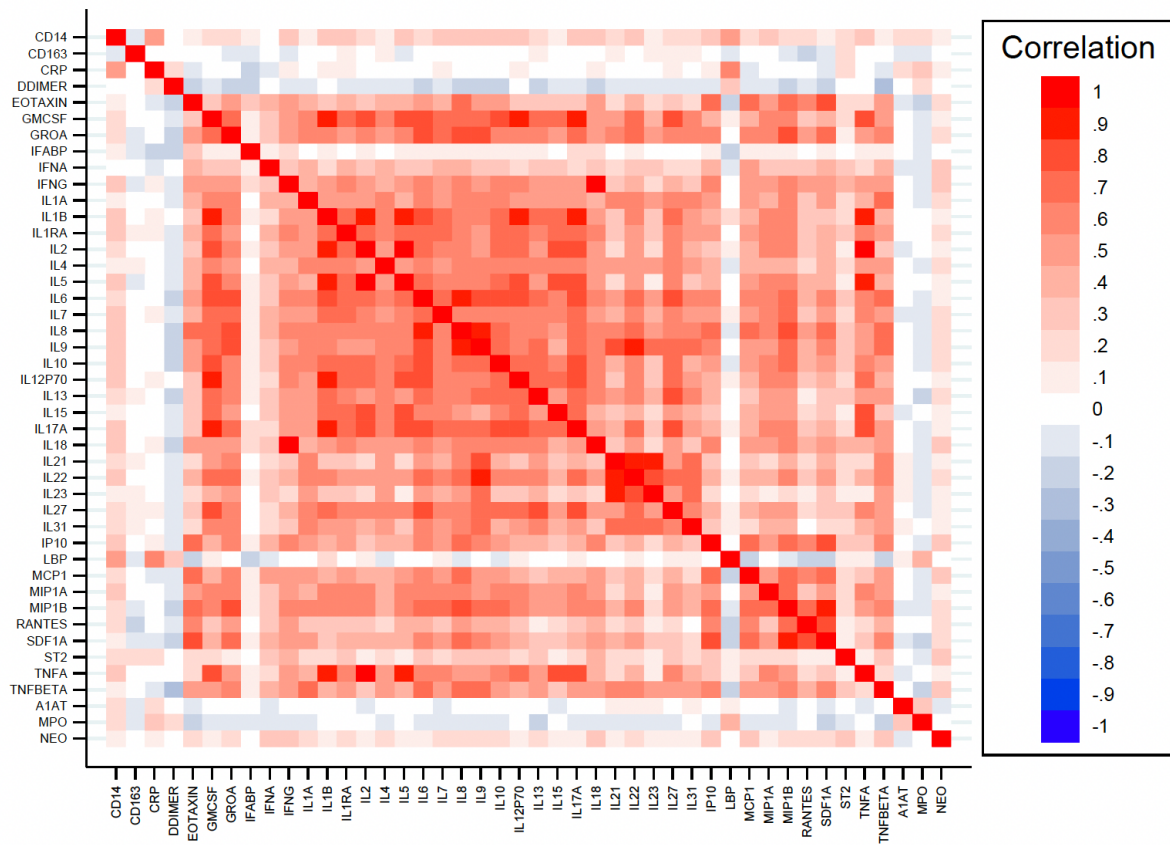

Supplementary Figure 3: Principal components scree plot

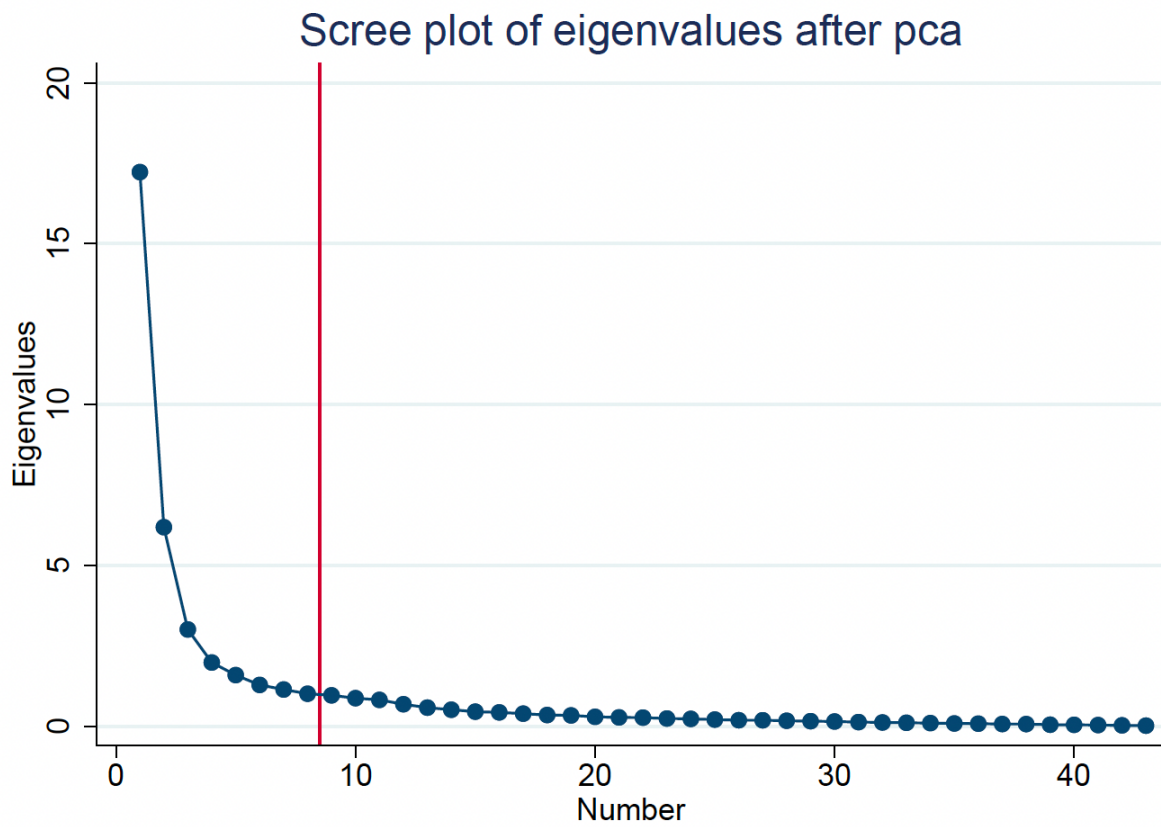

The red line shows the cutoff of the first 8 principal components selected to use for analysis.

Supplementary Figure 4: Principal components factor loadings

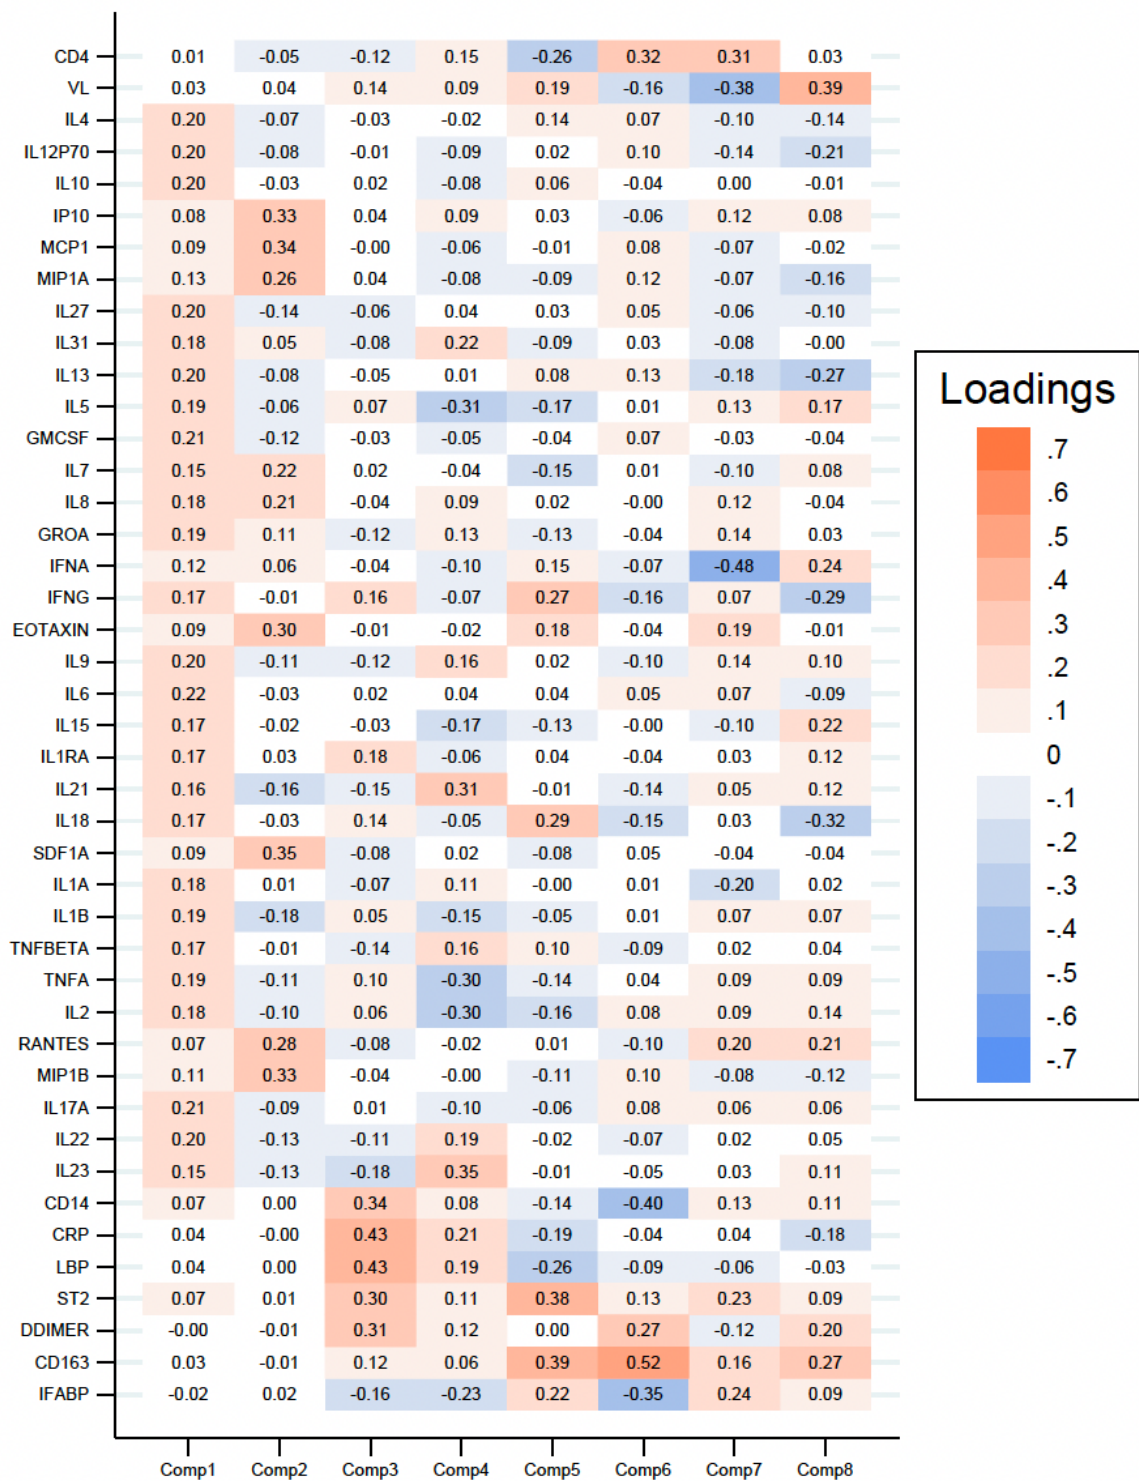

## REALITY TRIAL TEAM

The REALITY Trial Team who were not authors on the current manuscript are:

**Joint Clinical Research Centre (JCRC), Kampala, Uganda** (coordinating centre for Uganda): P Mugenyi, C Kityo, P Wavamunno, E Nambi, P Ocitti, M Ndigendawani.

**JCRC, Fort Portal, Uganda:** S Kabahenda, M Kemigisa, J Acen, DOlebo, G Mpamize, A Amone, D Okweny, A Mbonye, F Nambaziira, A Rweyora, M Kangah and V Kabaswahili.

**JCRC, Gulu, Uganda:** J Abach, G Abongomera, J Omongin, I Aciro, A Phillipam, B Arach, E Ocung, G Amone, P Miles, C Adong, C Tumsuiime, P Kidega, B Otto, F Apio.

**JCRC, Mbale, Uganda:** K Baleeta, A Mukuye, M Abwola, F Ssenono, D Baliruno, S Tuhirwe, R Namisi, F Kigongo, D Kikyonkyo, F Mushahara, D Okweny, J Tusiime, A Musiime, A Nankya, D Atwongyeire, S Siriky, S Mula, N Noowe.

**JCRC, Mbarara, Uganda:** A Lugemwa, M Kasozi, S Mwebe, L Atwine, T Senkindu, T Natuhurira, C Katemba, E Ninsiima, M Acaku J Kyomuhangi, R Ankunda, D Tukwasibwe, L Ayesiga.

**University of Zimbabwe Clinical Research Centre, Harare, Zimbabwe:** J Hakim, K Nathoo, A Reid, E Chidziva, T Mhute, GC Tinago, J Bhiri, S Mudzingwa, M Phiri, J Steamer, R Nhema, C Warambwa, G Musoro, S Mutsai, B Nemasango, C Moyo, S Chitongo, K Rashirai, S Vhembo, B Mlambo, S Nkomani, B Ndemera, M Willard, C Berejena, Y Musodza, P Matiza, B Mudenge, V Gutu.

**KEMRI Wellcome Trust Research Programme, Kilifi, Kenya:** A Etyang, C Agutu, K Maitland, P Njuguna, S Mwaringa, T Etyang, K Awuondo, S Wale, J Shangala, J Kithunga, S Mwarumba, S Said Maitha, R Mutai, M Lozi Lewa, G Mwambingu, A Mwanzu, C Kalama, H Latham, J Shikuku, A Fondo, A Njogu, C Khadenge, B Mwakisha.

**Moi University Clinical Research Centre, Eldoret, Kenya:** K Wools-Kaloustian, W Nyandiko, P Cheruiyot, A Sudoi, S Wachira, B Meli, M Karoney, A Nzioka, M Tanui, M Mokaya, W Ekiru, C Mboya, D Mwimali, C Mengich, J Choge, W Injera, K Njenga, S Cherutich, M Anyango Orido, G Omondi Lwande, P Rutto, A Mudogo, I Kutto, A Shali, L Jaika, H Jerotich, M Pierre.

**Department of Medicine and Malawi-Liverpool- Wellcome Trust Clinical Research Programme, College of Medicine, Blantyre, Malawi:** J Mallewa, S Kaunda, J Van Oosterhout, B O'Hare, R Heydermann, C Gonzalez, N Dzabala, C Kelly, B Denis, G Selemani, L Nyondo Mipando, E Chirwa, P Banda, L Mvula, H Msuku, M Ziwoya, Y Manda, S Nicholas, C Masesa, T Mwalukomo, L Makhaza, I Sheha, J Bwanali, M Limbuni.

**Trial Coordination and Oversight:** MRC Clinical Trials Unit at UCL, London, UK: M Thomason, S Pett, A Griffiths, H Wilkes, C Rajapakse, M Spyer, Data Management Systems: M Rauchenberger, N Van Looy, E Little, K Fairbrother.

**Social Science Group:** F Cowan, J Seeley, S Bernays, R Kawuma, Z Mupambireyi.

**Independent REALITY Trial Monitors:** F Kyomuhendo, S Nakalanzi, J Peshu, S Ndaa, JChabuka, N Mkandawire, L Matandika, C Kapuya.

**Trial Steering Committee:** I Weller (Chair), E Malianga, C Mwansambo, F Miiro, P Elyanu, E Bukusi, E Katabira, O Mugurungi, J Hakim, A Etyang, P Mugenyi, J Mallewa.

**Data Monitoring Committee:** T Peto (Chair), P Musoke, J Matenga, S Phiri.

**Endpoint Review Committee** (independent members): H Lyall (Co-Chair), V Johnston (Co-Chair), F Fitzgerald, F Post, F Ssali, A Arenas-Pinto, A Turkova, A Bamford.
